# Supplementary material for: Magnetic microspheres with polydopamine encapsulated ultra-small noble metal nanocrystals as mimetic enzymes for the colorimetric detection of H2O2 and glucose
Source: Royal Society of Chemistry journal article supplement (doi:10.1039/c9tb00755e), 2019-01-01
Supplement: c9tb00755e1.pdf [file c9tb00755e1.pdf]

# Magnetic microspheres with polydopamine encapsulated ultra-small noble metal nanocrystals as mimetic enzyme toward colorimetric detection of H<sub>2</sub>O<sub>2</sub> and glucose

*Linfeng Bai<sup>a</sup>, Wanquan Jiang<sup>a,\*</sup>, Min Sang<sup>a</sup>, Mei Liu<sup>a</sup>, Shouhu Xuan<sup>b,\*</sup>, Sheng Wang<sup>b</sup>,  
Ken Cham-Fai Leung<sup>c</sup>, Xinglong Gong<sup>b,\*</sup>*

*<sup>a</sup>Department of Chemistry, University of Science and Technology of China (USTC),  
Hefei, Anhui 230026, PR China*

*<sup>b</sup>CAS Key Laboratory of Mechanical Behavior and Design of Materials, Department  
of Modern Mechanics, CAS Center for Excellence in Complex System Mechanics,  
University of Science and Technology of China, Hefei, Anhui 230027, China*

*<sup>c</sup>Department of Chemistry, Partner State Key Laboratory of Biological and  
Environmental Analysis, The Hong Kong Baptist University, Kowloon, Hong Kong  
SAR, P. R. China*

Corresponding author: Tel: 86-551-63607605; Fax: 86-551-63600419.

E-mail: [jiangwq@ustc.edu.cn](mailto:jiangwq@ustc.edu.cn) (W. Q. Jiang)

[gongxl@ustc.edu.cn](mailto:gongxl@ustc.edu.cn) (X. L. Gong)

[xuansh@ustc.edu.cn](mailto:xuansh@ustc.edu.cn) (S. H. Xuan)

Table S1 the kinetic parameters of  $\text{Fe}_3\text{O}_4@\text{RF-Pt}@PDA$ .

| Catalyst                                 | Substance              | $K_m$ (mM) | $V_{max}$ ( $10^{-8}$ M/s) |
|------------------------------------------|------------------------|------------|----------------------------|
| $\text{Fe}_3\text{O}_4@\text{RF-Pt}@PDA$ | TMB                    | 0.187      | 23.84                      |
|                                          | $\text{H}_2\text{O}_2$ | 0.289      | 13.56                      |

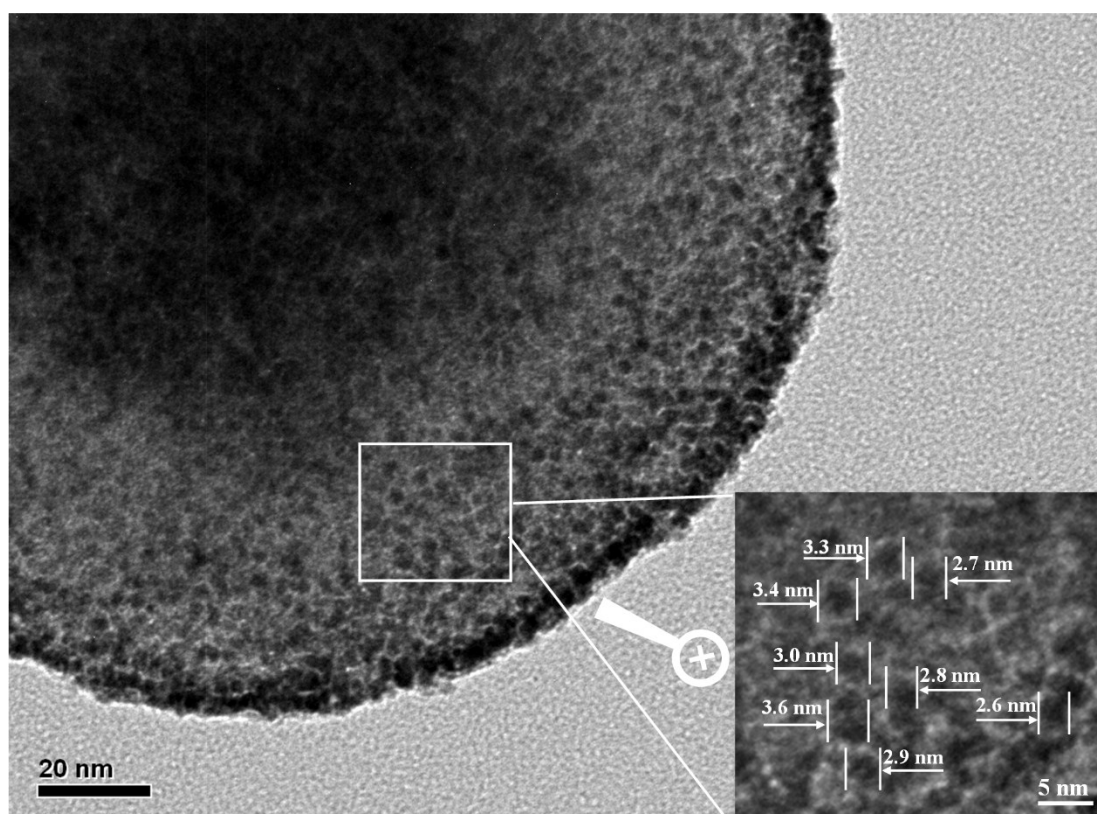

Fig. S1 High magnification TEM image of  $\text{Fe}_3\text{O}_4@\text{RF-Pt}$  (the inset is partial enlargement of TEM image which marked in rectangle area)

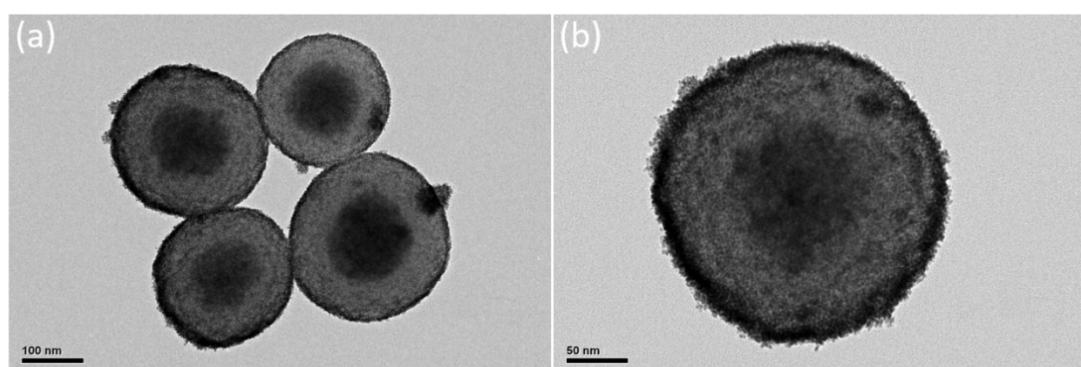

Fig. S2 TEM image of  $\text{Fe}_3\text{O}_4@\text{RF-Pt}$  with different magnification

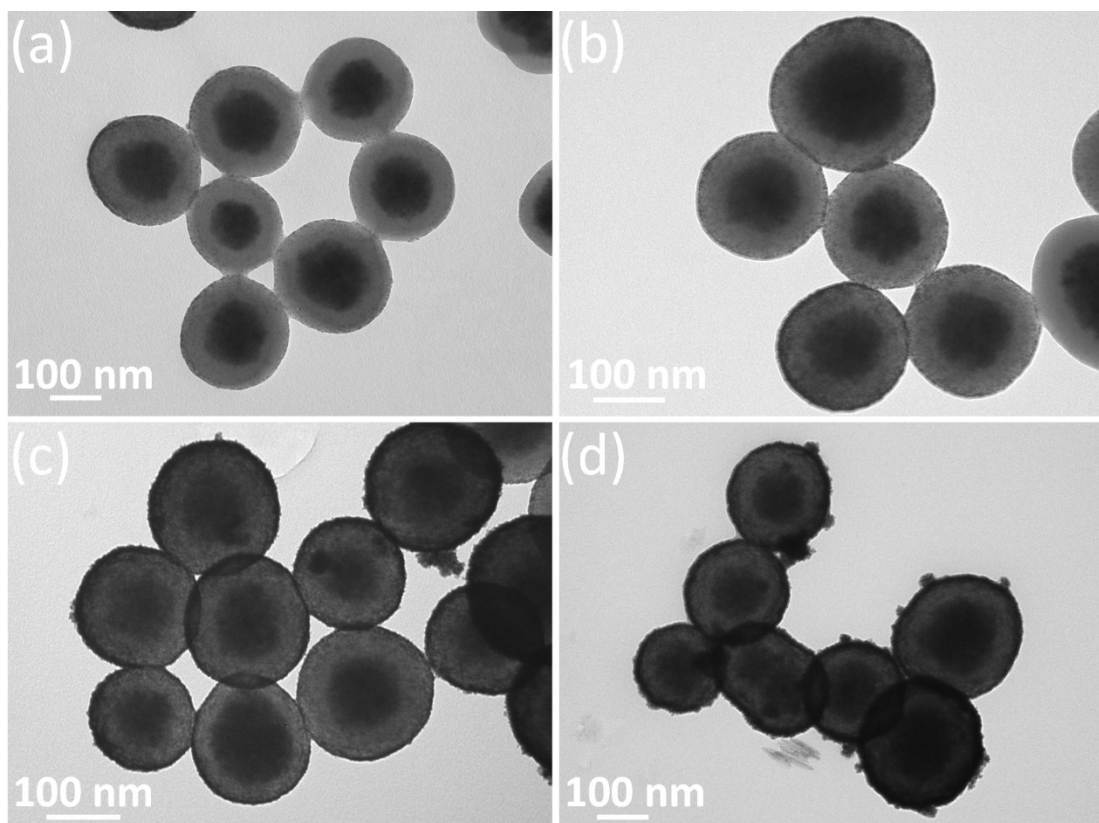

Fig. S3 TEM images of  $\text{Fe}_3\text{O}_4@\text{RF-Pt}$  prepared with different concentration of  $\text{PtCl}_6^{2-}$ : 9.6  $\mu\text{M}$  (a), 19.2  $\mu\text{M}$  (b), 28.8  $\mu\text{M}$  (c), 38.4  $\mu\text{M}$  (d).

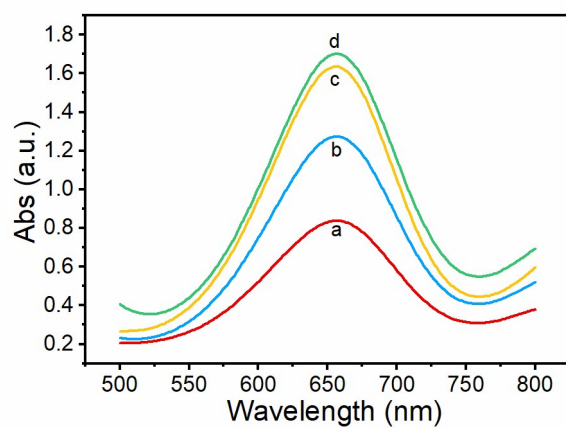

Fig. S4 the adsorption spectra of TMB oxidation product catalyzed by  $\text{Fe}_3\text{O}_4@\text{RF-Pt}@PDA$  that prepared with different concentration of  $\text{PtCl}_6^{2-}$ : 9.6  $\mu\text{M}$  (a), 19.2  $\mu\text{M}$  (b), 28.8  $\mu\text{M}$  (c), 38.4  $\mu\text{M}$  (d).

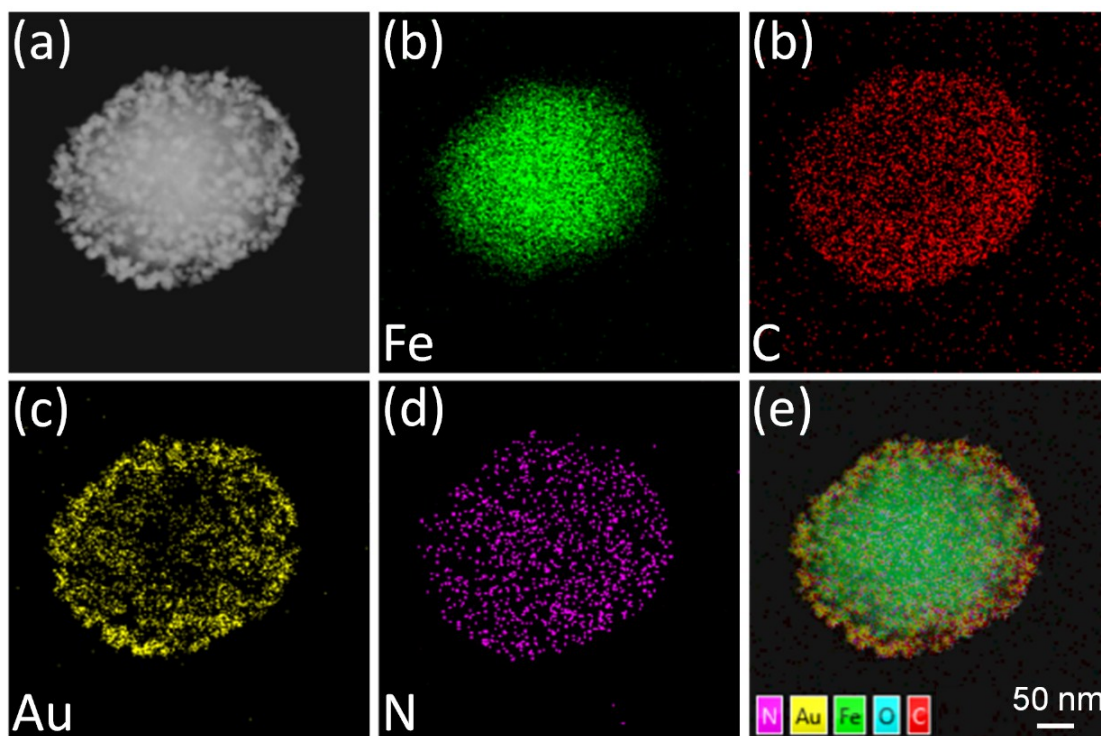

Fig. S5 HAADF STEM image of  $\text{Fe}_3\text{O}_4@\text{RF-Au@PDA}$  (a) and corresponding elemental mapping images (b-f)

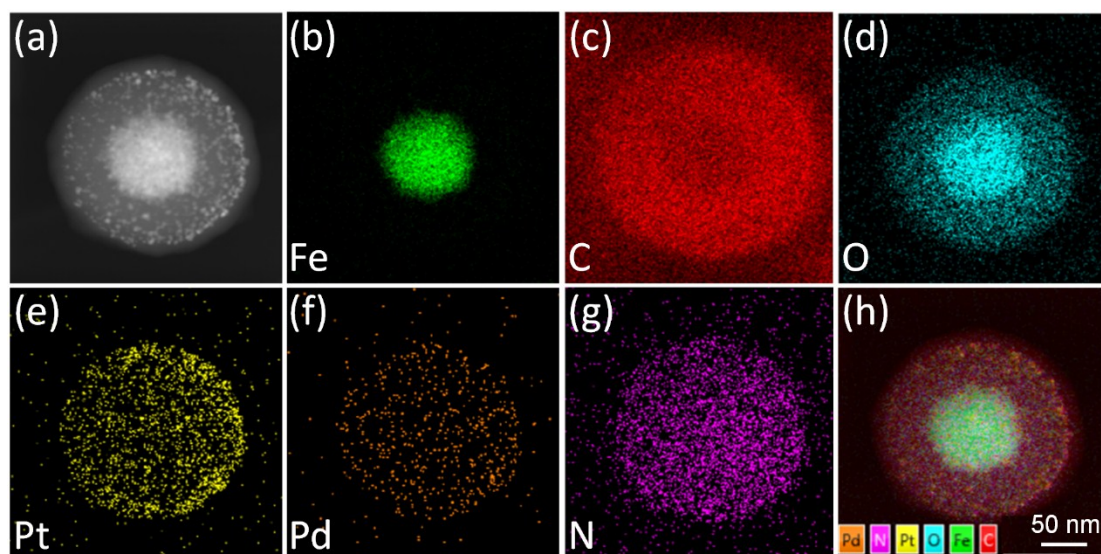

Fig. S6 HAADF STEM image of  $\text{Fe}_3\text{O}_4@\text{RF-PtPd@PDA}$  (a) and corresponding elemental mapping images (b-f)

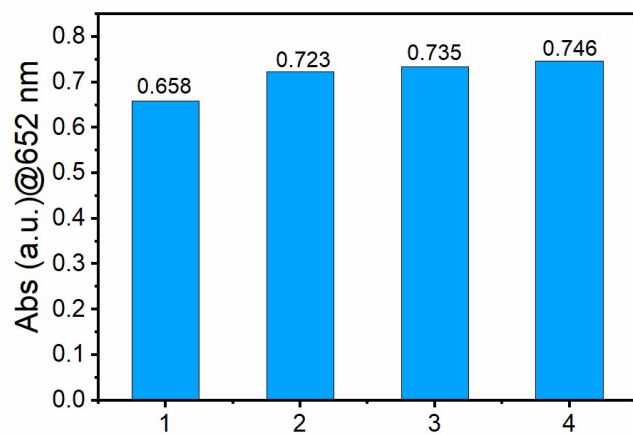

Fig. S7 absorbance at 652 nm for different samples after incubation with GOx 1: fresh grape juice; 2: grape beverage; 3: fresh litchi juice; 4: freshly prepared 0.2 M glucose solution
